# Supplementary material
Source: PubMed Central journal article supplement (PMC6886681)

**Figure S2****A**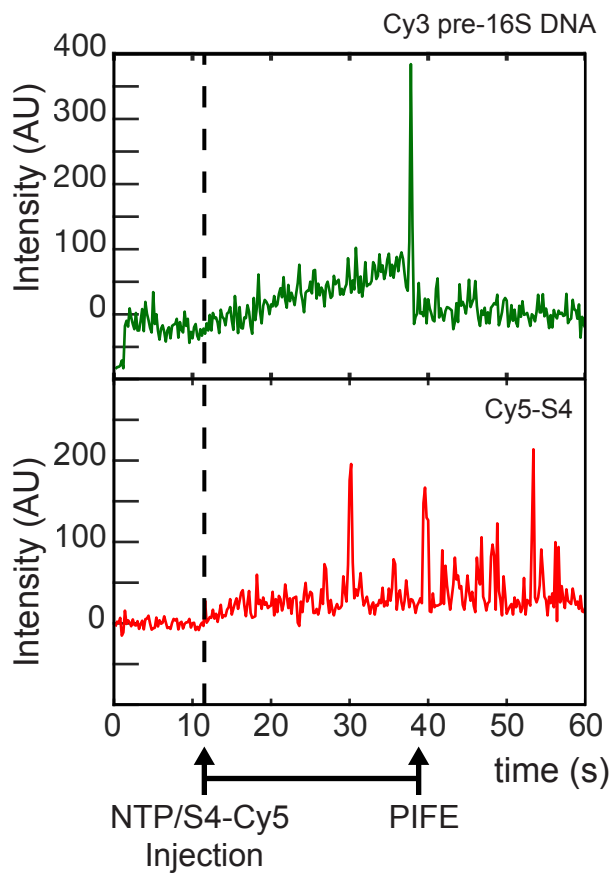**B**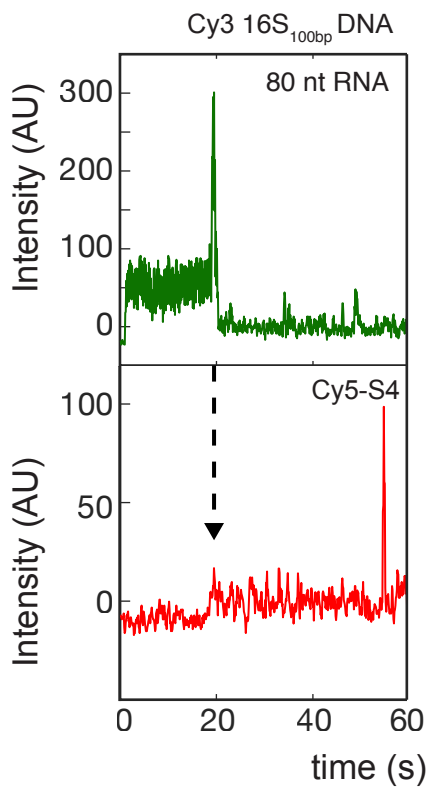**C**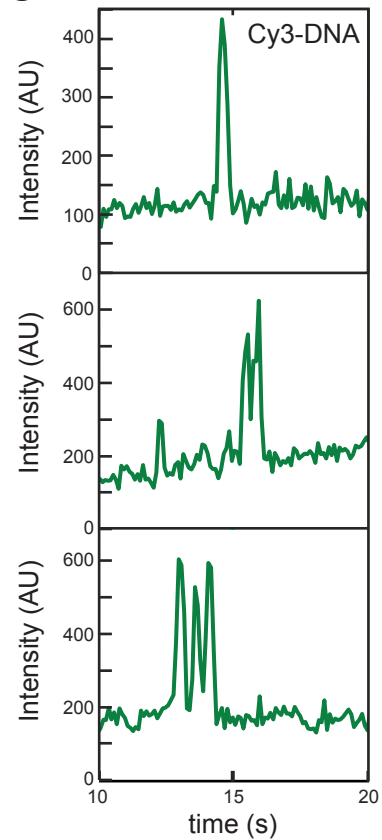**D**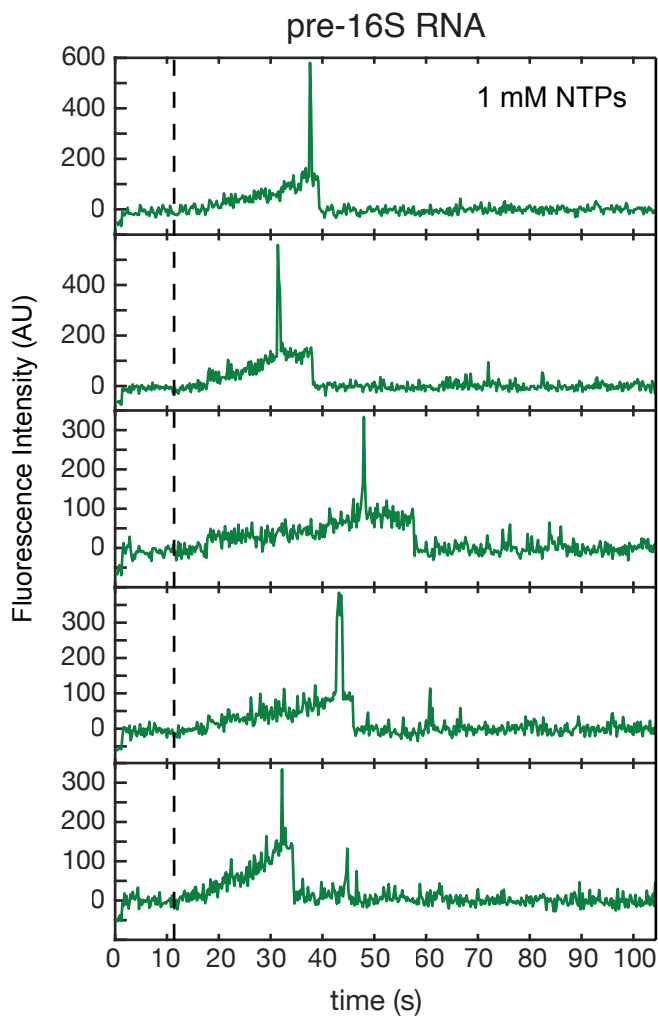**E**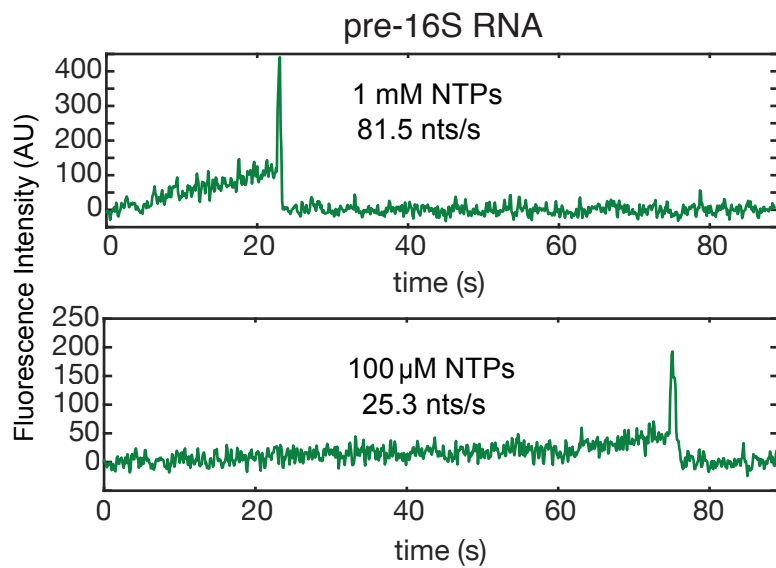

Supplement: NIHMS1542049-supplement-2.pdf [file NIHMS1542049-supplement-2.pdf]

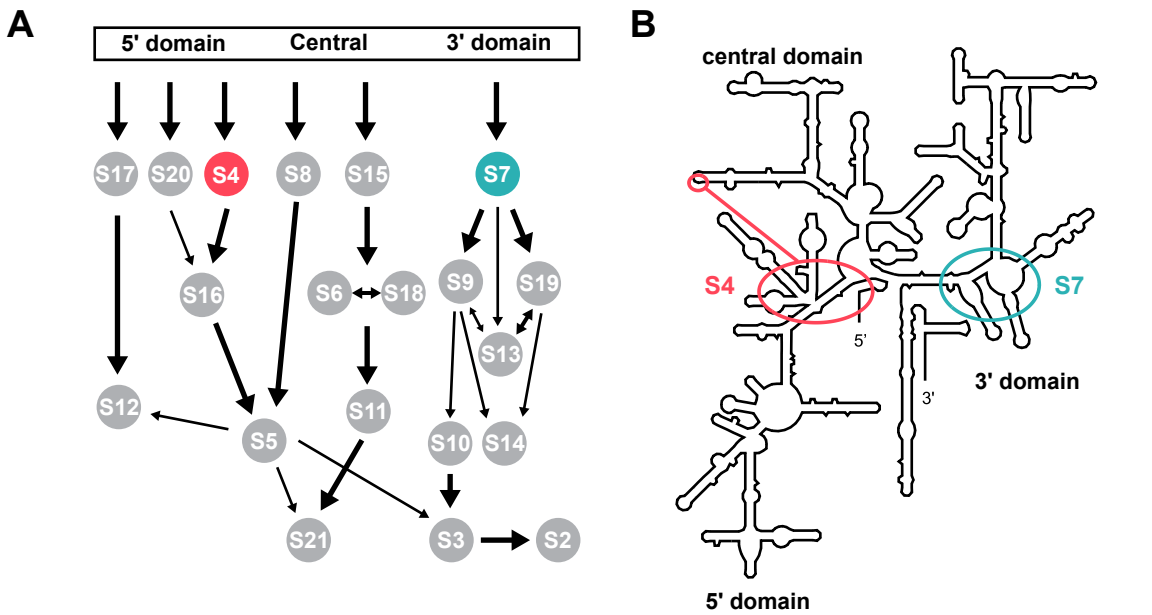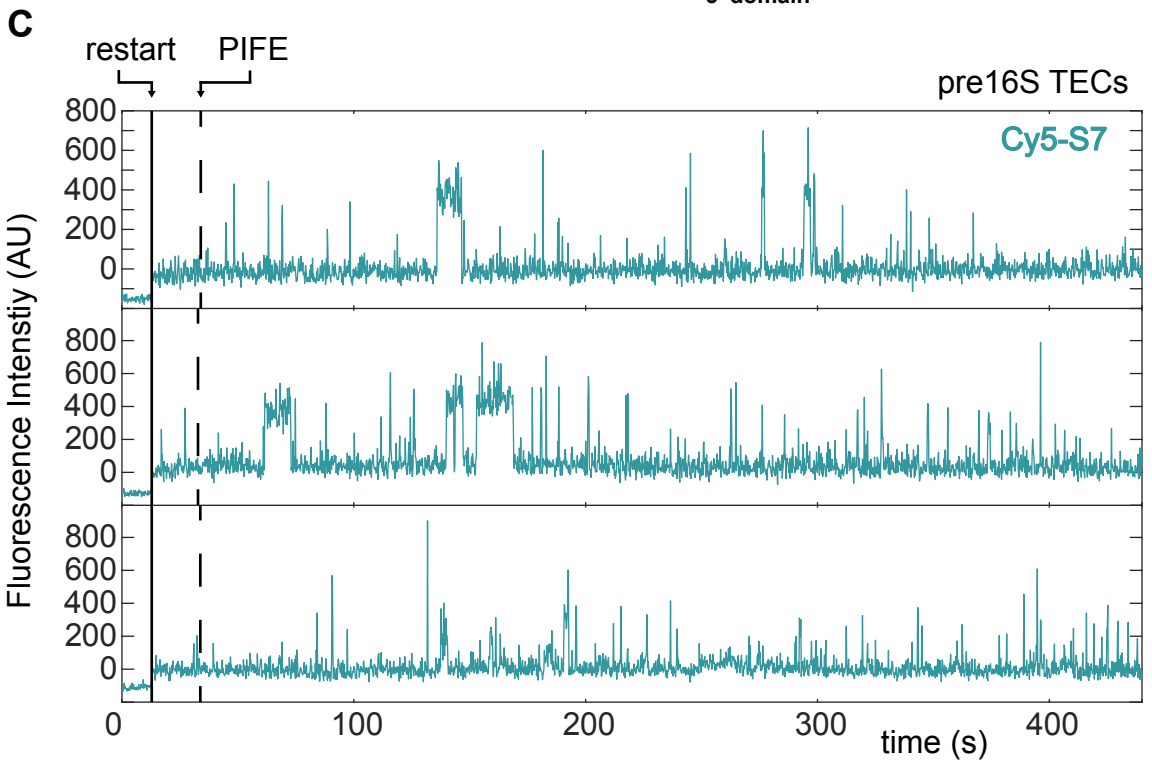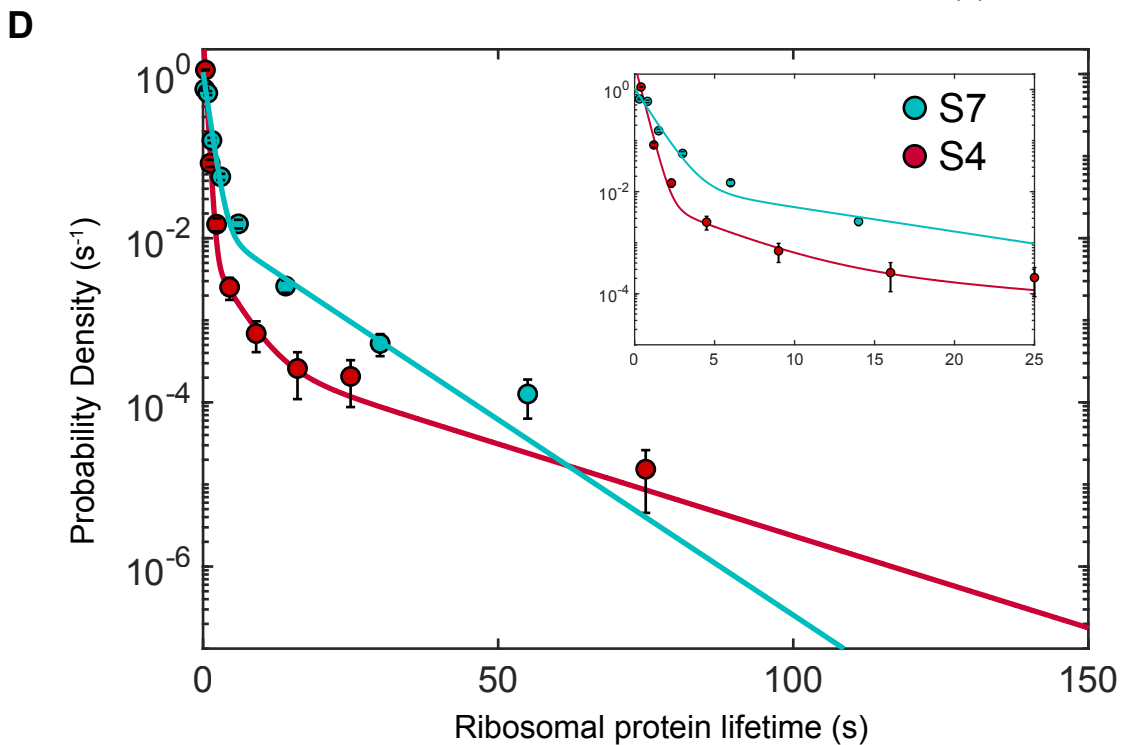

Supplement: NIHMS1542049-supplement-4.pdf [file NIHMS1542049-supplement-4.pdf]

**A**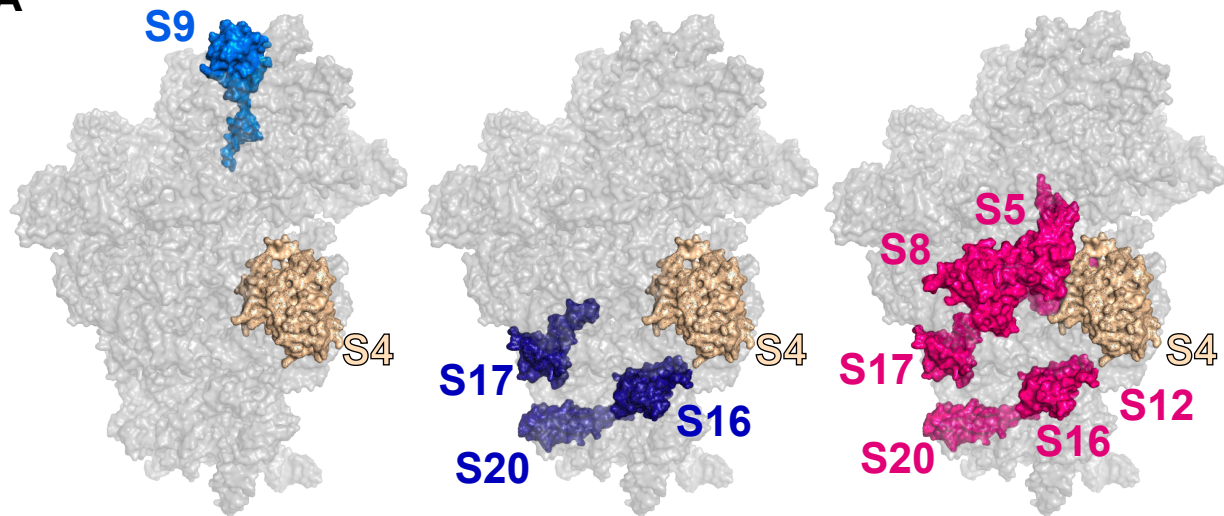**B**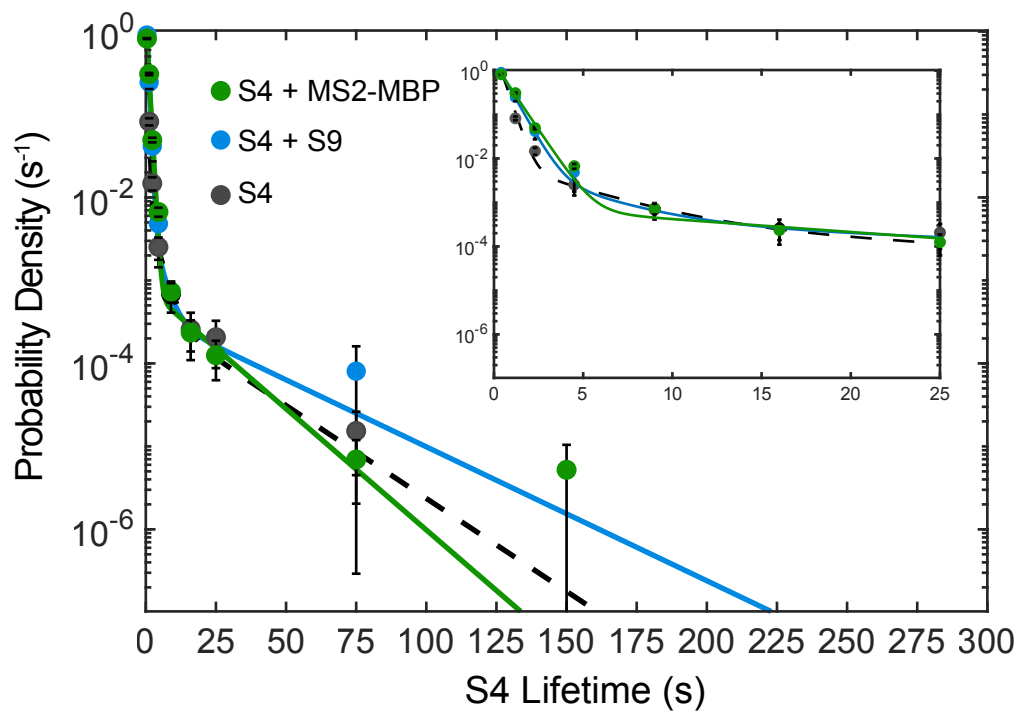**C**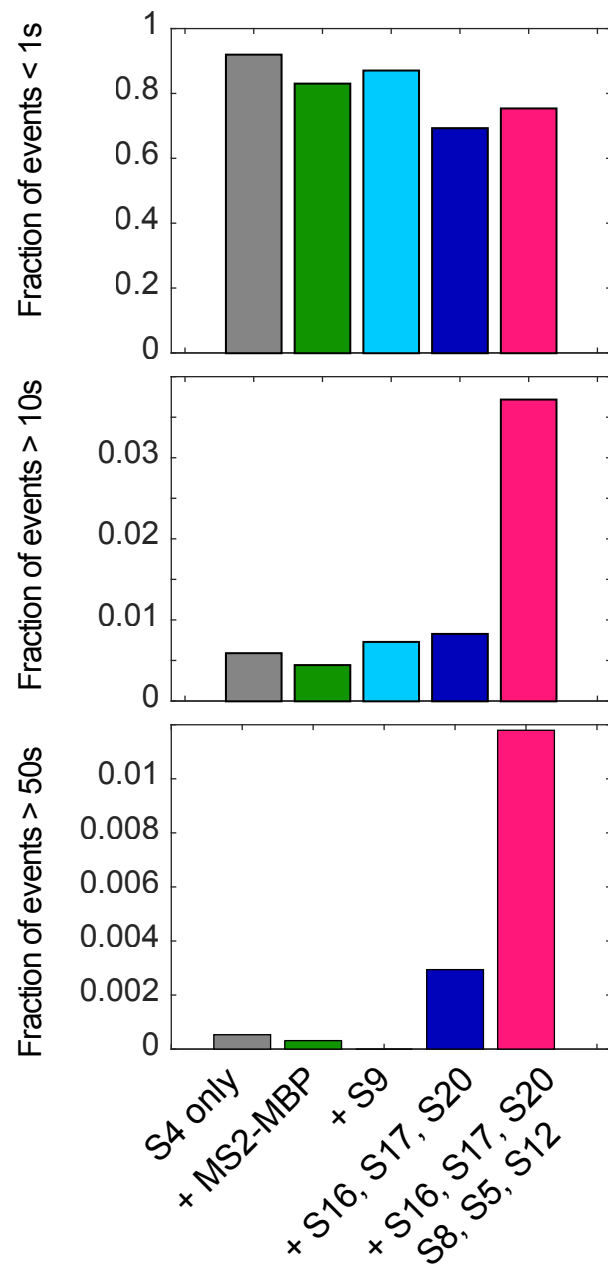

Supplement: NIHMS1542049-supplement-6.pdf [file NIHMS1542049-supplement-6.pdf]
